# Supplementary material for: Efficient retention of mud drives land building on the Mississippi Delta plain
Source: Copernicus journal article supplement (doi:10.5194/esurf-5-387-2017), 2017-07-12
Supplement: Supplementary file [file esurf-5-387-2017-supplement-title-page.pdf › esurf-5-387-2017-supplement-title-page.pdf]

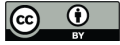

## *Supplement of*

# **Efficient retention of mud drives land building on the Mississippi Delta plain**

**Christopher R. Esposito et al.**

*Correspondence to:* Christopher R. Esposito ([cresposito@gmail.com](mailto:cresposito@gmail.com))

- [esurf-5-387-2017-supplement-title-page.pdf](#)
- [EspositoEA\\_SupplementalData.xlsx](#)

The copyright of individual parts of the supplement might differ from the CC BY 3.0 License.
